# Supplementary material for: Adenomatous Polyposis Coli and Hypoxia-inducible Factor-1α Have an Antagonistic Connection
Source: PubMed Central journal article supplement — Mol Biol Cell. 2010 Nov 1;21(21):3630–8. doi: 10.1091/mbc.E10-04-0312 (PMC2965681; doi:10.1091/mbc.e10-04-0312), 2010-11-01

## **SUPPLEMENTARY MATERIAL AND METHODS**

### ***Additional primer sequences:***

qPCR sequences

PHD2

For-GAAAGCCATGGTTGCTTGTT

Rev-TGTCCTTCTGGAAAAATTCG

BNIP3

For-GCCCACCTCGCTCGCAGACAC

Rev-CAATCCGATGGCCAGCAAATGAGA

### ***Immunofluorescence microscopy***

For immunofluorescence, cells were grown on coverslips and treated as indicated prior to fixation by incubation in 3.7% formaldehyde/PBS (pH 6.8) for 15 minutes. Cells were permeabilized in PBS-0.1% Triton X-100 for 15 minutes and then blocked in PBS-0.05% Tween-20 supplemented with 1% normal donkey serum for 30 minutes. The dilutions of the antibodies used were: rabbit anti-RelA 1:200 and goat anti-LC3B 1:50. Secondary antibody labelled with X-Red and FITC were purchased from Jackson ImmunoResearch and used at 1:500. Cells were stained with primary antibodies without secondary antibodies to control for auto-fluorescence or stained with secondary antibodies alone to control for background staining. Cells were analysed and images were acquired using a DeltaVision microscope. Images were deconvolved and analysed using OMERO client software (Open Microscopy Environment).

**Supplementary Figure Legends**

**Sup. Figure 1.** Hypoxia represses APC in a HIF-1 $\alpha$  dependent manner. (A) U2OS cells were exposed to 1% O<sub>2</sub> for the indicated periods of time prior to lysis. Whole cell lysates were analysed by immunoblotting using the depicted antibodies. (B) U2OS, HCT-116 and HA $\beta$ 18 cells were transfected with control and HIF-1 $\alpha$  siRNA oligonucleotides prior to exposure to 1% O<sub>2</sub> for 24h and total RNA extraction. RT-qPCR for APC and HIF-1 $\alpha$  was performed with Actin as a reference gene. Graph depicts the mean plus SD of a minimum of 3 independent experiments performed in duplicate. Anova student t-test were performed and \* indicates the level of significance. \*p<0.05, \*\*p<0.01, \*\*\*p<0.005.

**Sup. Figure 2.** Hypoxia reduced the levels of Acetylated H3 at the APC promoter. U2OS cells were exposed to 1% O<sub>2</sub> for 24h prior to fixation and lysis. Acetylated H3 bound DNA was amplified with specific primers spanning the annotated HRE region on the CA9 and the putative HRE at the APC promoter. Rabbit IgG was used as a control for the immunoprecipitation. Levels of Acetylated H3 were quantified using ImageJ software and graph depicts the results of 3 independent experiments. Anova student t-test were performed and \* indicates the level of significance. \*p<0.05, \*\*p<0.01, \*\*\*p<0.005.

**Sup. Figure 3.** APC depletion increases HIF-1 levels and activity. (A) U2OS cells were transfected with control and APC siRNA oligonucleotides and treated with 50 $\mu$ M MG132 for 3h prior to harvest. Whole cell lysates were analysed by Western blot to detect the levels of HIF-1 $\alpha$  and Actin. (B) U2OS cells were transfected with control and

APC siRNA oligonucleotides for 48h prior to total RNA extraction. Where indicated, cells were exposed to 1% O<sub>2</sub> for 24h. Following cDNA synthesis, qPCR was performed for the HIF-1 $\alpha$  target genes ADM and PHD2. Graph depicts the mean plus SD of a minimum of 3 independent experiments performed in duplicate. Anova student t-test were performed and \* indicates the level of significance. \*p<0.05, \*\*p<0.01, \*\*\*p<0.005.

**Sup. Figure 4.** Increased HIF-1 $\alpha$  activity following APC depletion requires wildtype  $\beta$ -catenin. HCT-116 (parental), HA $\beta$ 85 (wildtype  $\beta$ -catenin) and HA $\beta$ 18 (mutant  $\beta$ -catenin) were transfected with control or APC siRNA oligonucleotides for 48h prior to RNA extraction and exposed or not to 1% O<sub>2</sub> for 24h. RT-qPCR was performed for the HIF-1 $\alpha$  target genes indicated. Graph depicts mean plus SD of a minimum of 3 independent experiments performed in duplicate. Anova student t-test were performed and \* indicate the level of significance. \*p<0.05, \*\*p<0.01, \*\*\*p<0.005.

**Sup. Figure 5** NF- $\kappa$ B activation following TNF- $\alpha$  is altered by different levels of  $\beta$ -catenin. (A) HCT-116 (parental), HA $\beta$ 85 (wildtype  $\beta$ -catenin) and HA $\beta$ 18 (mutant  $\beta$ -catenin) were treated with 10ng/mL TNF- $\alpha$  for 30m prior to cellular fractionation. Nuclear extracts were analysed by Western blot for the level of RelA nuclear translocation. Chk1 was used as a loading control. (B) HCT-116 (parental), HA $\beta$ 85 (Wildtype  $\beta$ -catenin) and HA $\beta$ 18 (Mutant  $\beta$ -catenin) were treated with 10ng/mL TNF- $\alpha$  for 30m prior to fixation and immunostaining with RelA antibody. Cells were imaged using a DeltaVision microscope, deconvolved and analysed using OMERO open source

software. (C) Cells were processed as in A, with cytoplasmic extracts analysed by Western blot for the levels of phosphorylated and total I $\kappa$ B- $\alpha$ . Actin was used as a loading control.

**Sup. Figure 6.** Increased HIF-1 $\alpha$  following APC depletion requires NF- $\kappa$ B. (A) U2OS were transfected with the indicated siRNA oligonucleotides for 48h prior to RNA extraction. qPCR was performed for the levels of HIF-1 $\alpha$ , RelA and APC, with Actin used as normalising gene. Graph depicts the mean plus SD of a minimum of 3 independent experiments performed in duplicate. (B) U2OS cells were treated as in A but whole cell lysates were performed. Levels of APC and RelA were analysed by Western blot. Tubulin was used as loading control. Anova student t-test were performed and \* indicate the level of significance. \*p<0.05, \*\*p<0.01, \*\*\*p<0.005.

**Sup. Figure 7.** Hypoxia induced LC3B puncta is HIF-1 $\alpha$  dependent. HA $\beta$ 85 (wildtype  $\beta$ -catenin) and HA $\beta$ 18 (mutant  $\beta$ -catenin) were transfected with control, APC or HIF-1 $\alpha$  siRNA oligonucleotides prior to exposure to 1% O<sub>2</sub> for 24h. Cells were fixed and immunostained with LC3B antibody. Cells were imaged using a DeltaVision microscope, deconvolved and analysed using OMERO open source software.

A

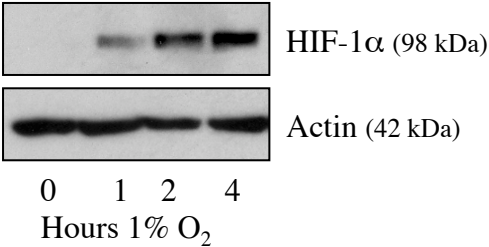

B

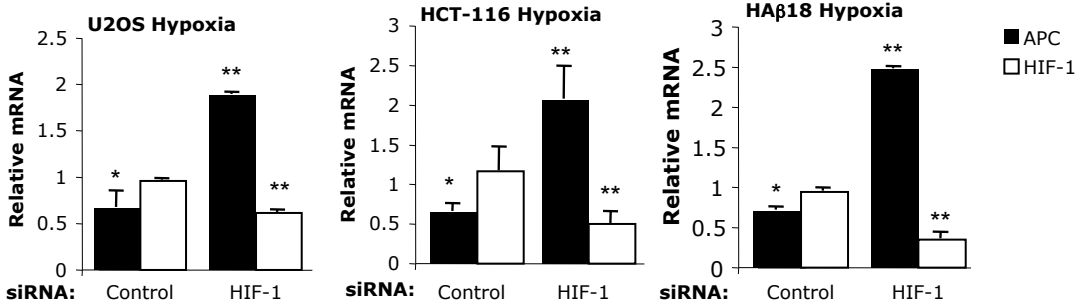

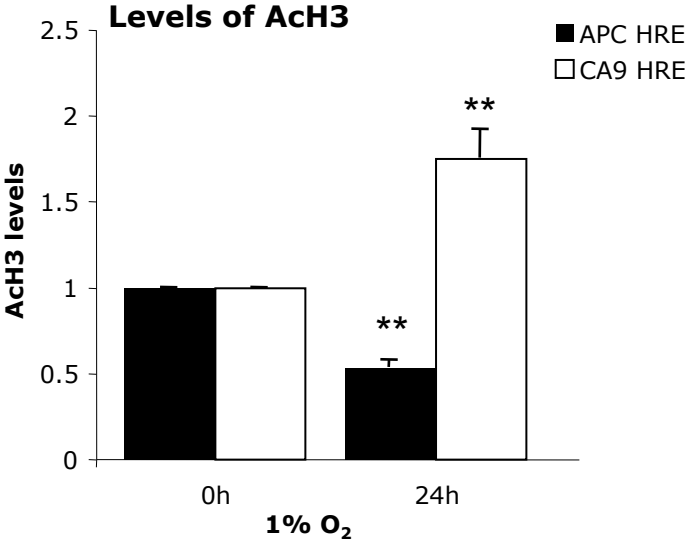

**A**

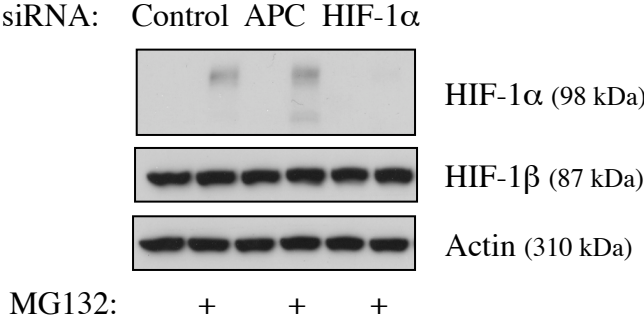

**B**

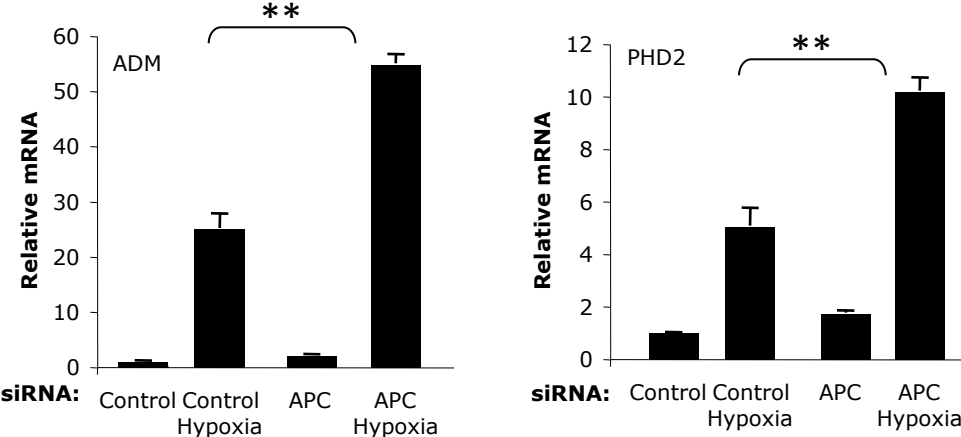

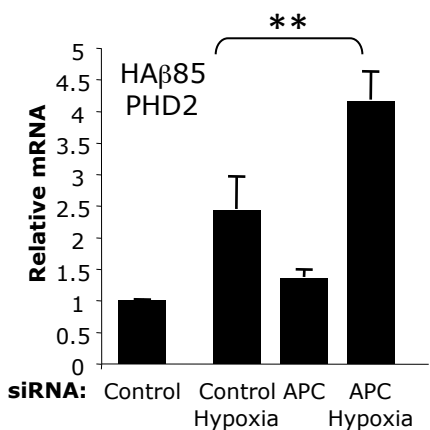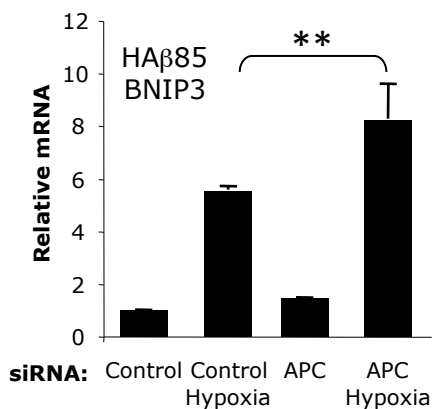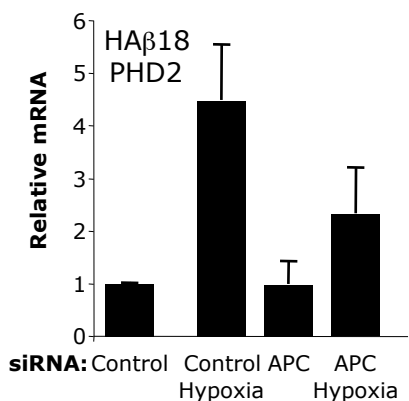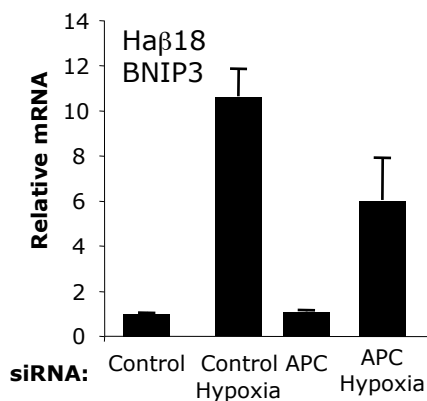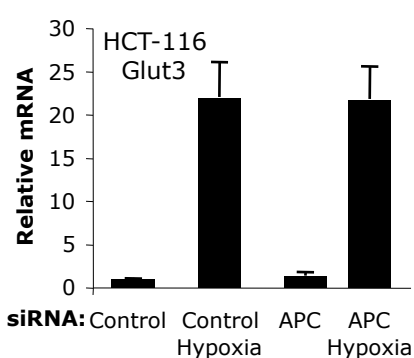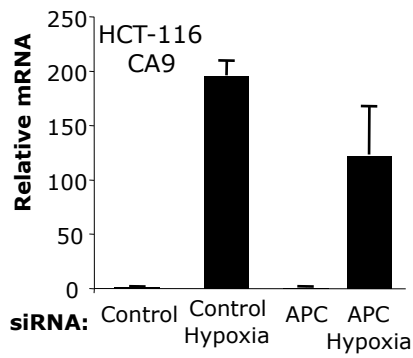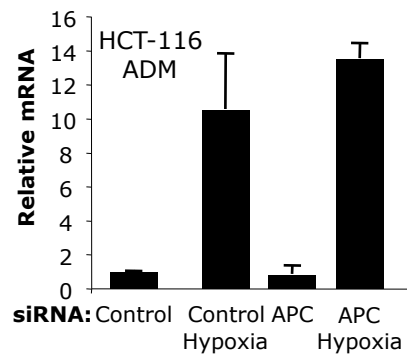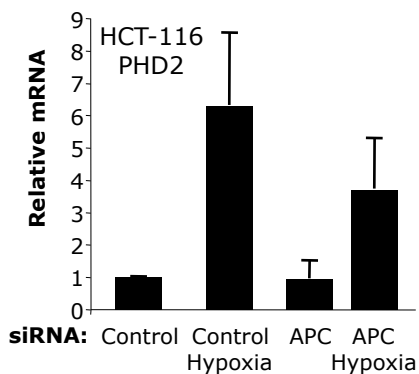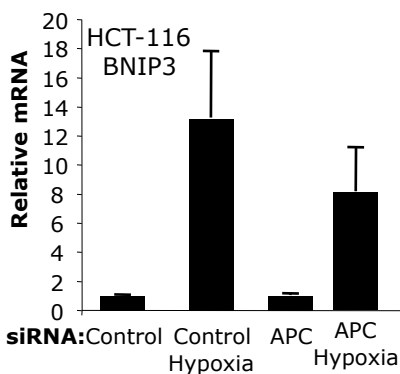



**A**

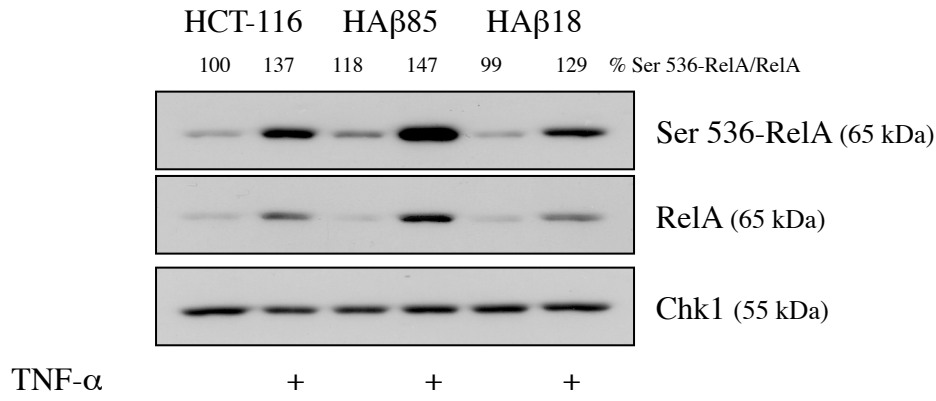

**B**

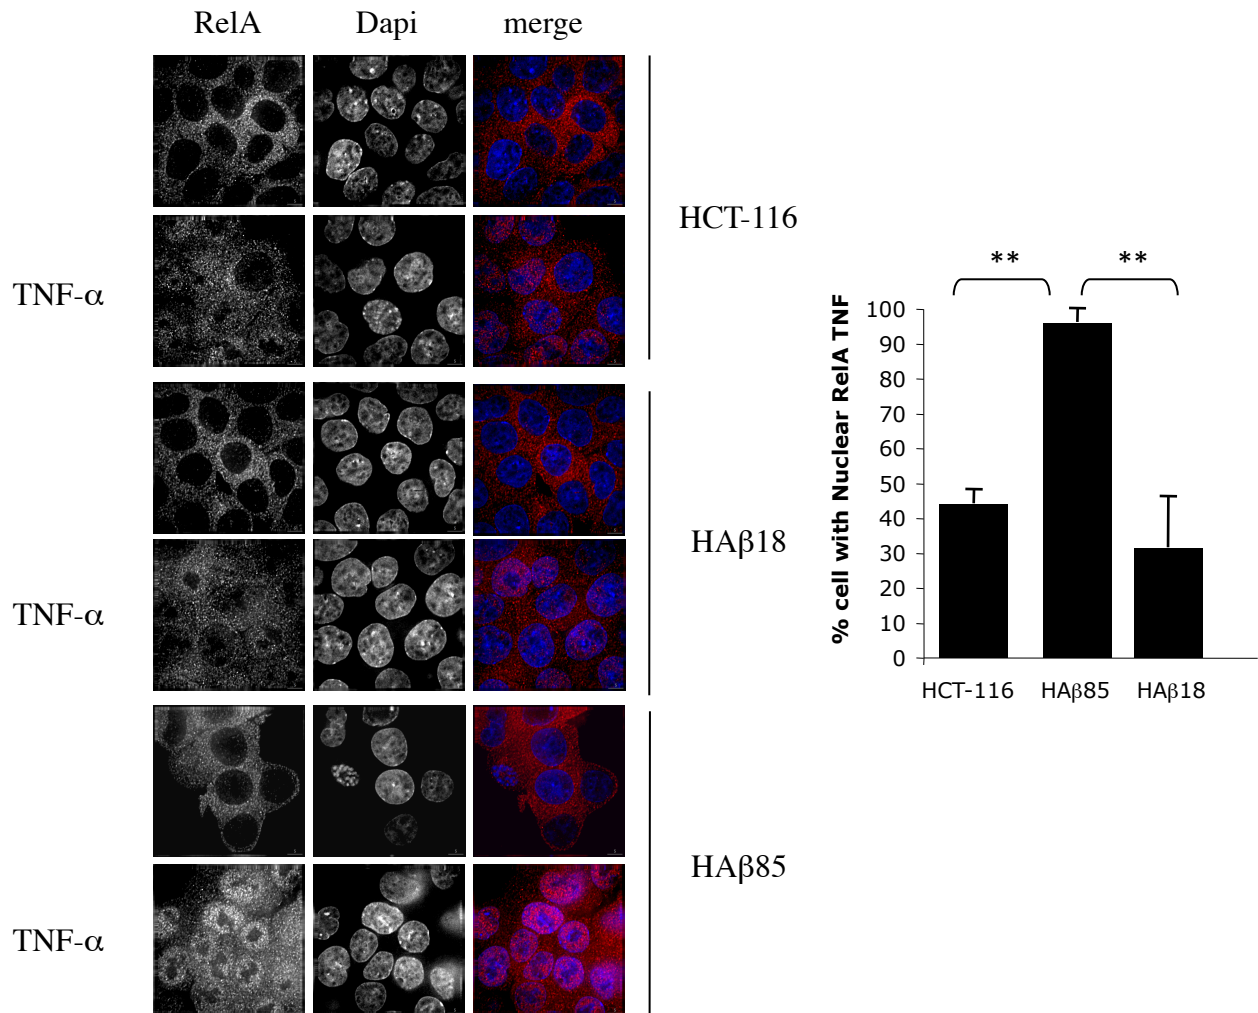

**C**

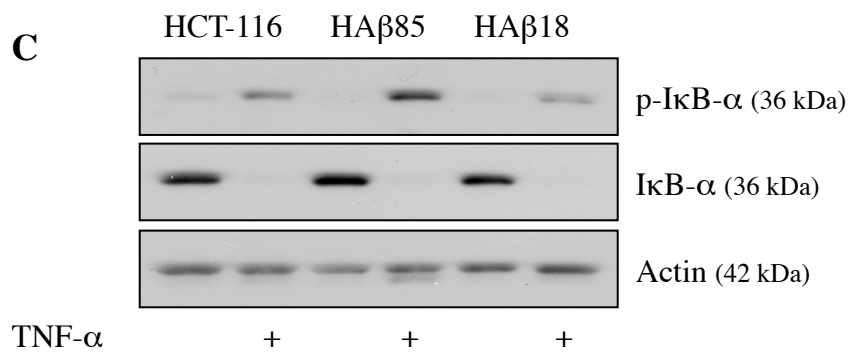

**A**

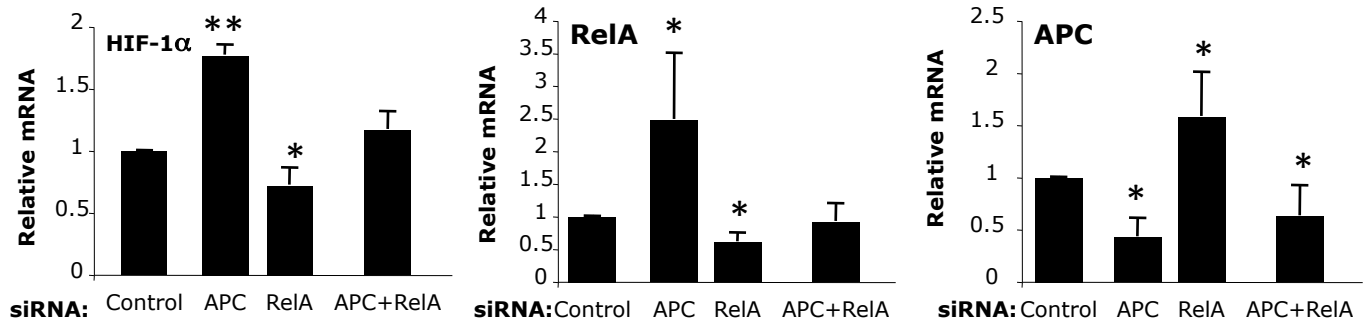

**B**

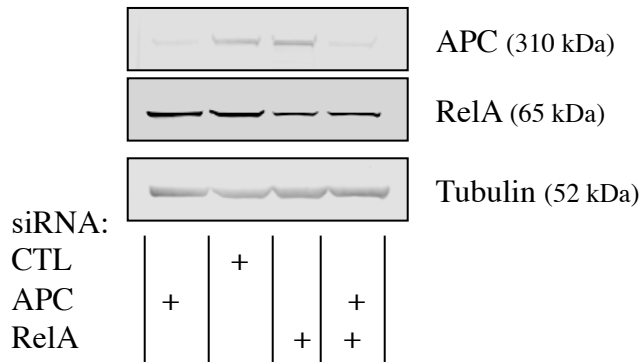

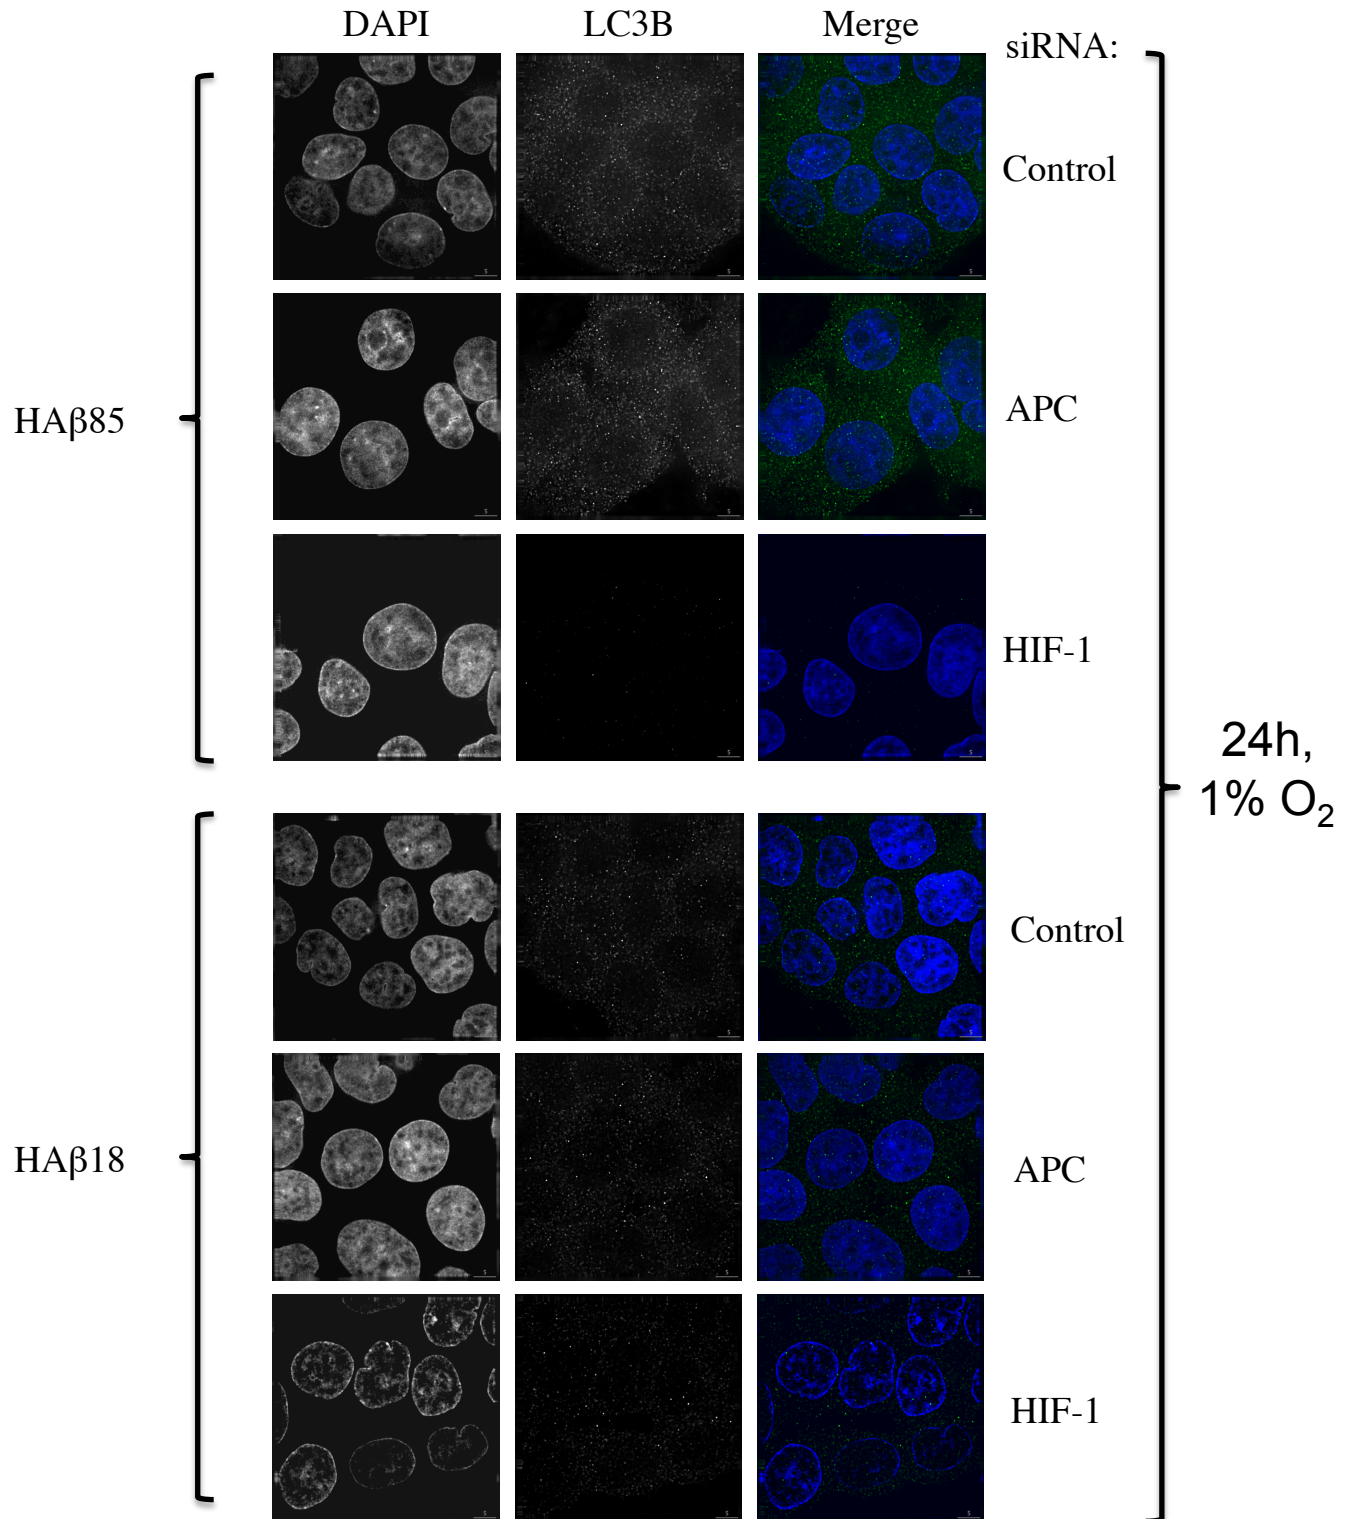

Supplement: E10-04-0312_1.pdf [file E10-04-0312_1.pdf]
